# Supplementary material for: Fundamental Motor Skills Mediate the Relationship Between Physical Fitness and Soccer-Specific Motor Skills in Young Soccer Players
Source: PubMed Central journal article supplement (PMC6546828; doi:10.3389/fphys.2019.00596), 2019-05-28
Supplement: Data_Sheet_1.pdf [file Data_Sheet_1.pdf]

**Supplementary Table 1** Values of the study variables in forty male soccer players.

| Physical fitness | Maturity Offset | FMS | Speed dribbling |
|------------------|-----------------|-----|-----------------|
| 24               | -2,86488        | 64  | 12,19           |
| 24               | -3,264625       | 70  | 10,95           |
| 24               | -3,166268       | 63  | 11,68           |
| 26               | -2,758025       | 67  | 11,93           |
| 27               | -3,02691        | 70  | 11,81           |
| 22               | -3,143975       | 66  | 12,36           |
| 20               | -2,642437       | 59  | 11,99           |
| 22               | -2,849132       | 59  | 15,21           |
| 27               | -2,947868       | 66  | 12,79           |
| 19               | -2,254609       | 70  | 11,43           |
| 15               | -2,439063       | 52  | 14,42           |
| 23               | -3,686818       | 70  | 12,79           |
| 21               | -3,042033       | 67  | 15,43           |
| 18               | -2,589528       | 63  | 12,45           |
| 22               | -2,115641       | 59  | 12,13           |
| 25               | -2,642728       | 54  | 12,89           |
| 27               | -2,945545       | 69  | 13,86           |
| 20               | -3,334024       | 70  | 14,23           |
| 22               | -2,779396       | 61  | 13,13           |
| 24               | -3,113298       | 65  | 12,59           |
| 23               | -2,981064       | 48  | 14,12           |
| 20               | -2,680835       | 46  | 14,83           |
| 18               | -2,999039       | 55  | 14,3            |
| 18               | -2,586609       | 44  | 15,05           |
| 22               | -2,785642       | 52  | 12,83           |
| 21               | -3,015559       | 54  | 12,03           |
| 20               | -2,703407       | 48  | 16              |
| 14               | -2,890193       | 48  | 13,68           |
| 15               | -3,016932       | 48  | 15,7            |
| 18               | -2,748745       | 44  | 14,81           |
| 25               | -2,64936        | 46  | 15,48           |
| 21               | -2,800492       | 61  | 12,47           |
| 19               | -2,902526       | 54  | 13,77           |
| 18               | -3,182431       | 58  | 17,24           |
| 23               | -3,377713       | 59  | 14,76           |
| 17               | -3,094103       | 48  | 14,04           |
| 17               | -2,511458       | 55  | 15,39           |
| 20               | -3,030631       | 56  | 13,23           |
| 22               | -2,861027       | 43  | 15,54           |
| 19               | -2,934551       | 42  | 15,61           |

FMS fundamental motor skills.
